# Supplementary material
Source: PubMed Central journal article supplement (PMC6180334)

**SUPPORTING INFORMATION**

1. Low affinity of non-saccharide porphyrins to MDA-MB-231 human breast cancer cells, compared to P-Glu<sub>4</sub>.

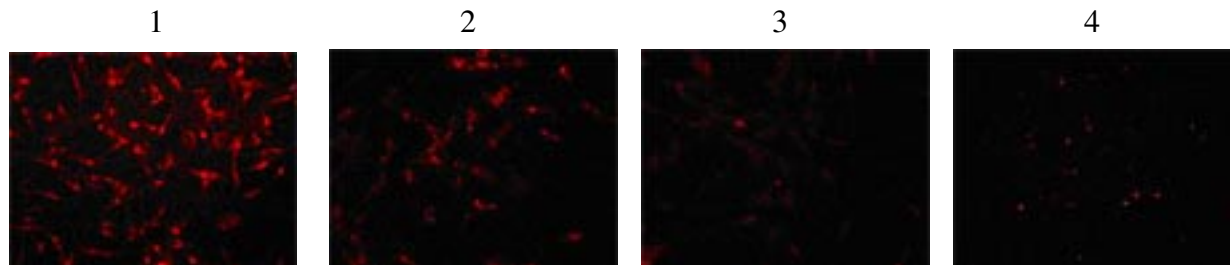

1. P-Glu<sub>4</sub>
2. meso-tetra (4-Carboxyphenyl)porphyrin tetramethyl ester
3. meso-tetra(4-Methoxyphenyl)porphyrin
4. TPPF<sub>20</sub>

2. Low affinity of acetyl protected tetra-glucose porphyrin to MDA-MB-231 human breast cancer cells, compared to unprotected tetra-glucose porphyrin (P-Glu<sub>4</sub>).

Unprotected tetra-glucose  
porphyrin (P-Glu<sub>4</sub>)

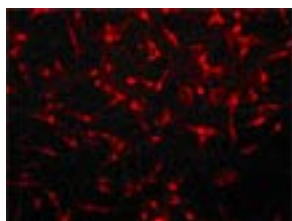

Acetyl protected tetra-  
glucose porphyrin

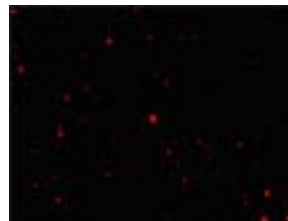

3. Low affinity of P-Gal<sub>4</sub> to fully transformed 3Y1<sup>v-Src</sup> rat fibroblast, compared to P-Glu<sub>4</sub>.

P-Glu<sub>4</sub>

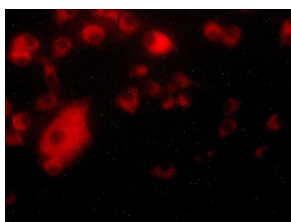

P-Gal<sub>4</sub>

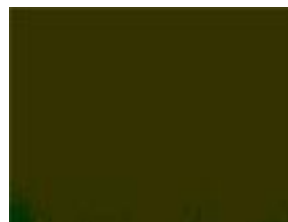

4. Extinction coefficients of TPPF<sub>20</sub>, P-Glu<sub>4</sub> and P-Gal<sub>4</sub>.

| $\epsilon$ (L/mol·cm)                                 | Soret Band         | Q <sub>1</sub>      | Q <sub>2</sub>     | Q <sub>3</sub>     | Q <sub>4</sub>      |
|-------------------------------------------------------|--------------------|---------------------|--------------------|--------------------|---------------------|
| TPPF <sub>20</sub> (CH <sub>2</sub> Cl <sub>2</sub> ) | $6.50 \times 10^5$ | $4.46 \times 10^4$  | $4.47 \times 10^3$ | $1.51 \times 10^4$ | $3.20 \times 10^3$  |
| TPPF <sub>20</sub> (CH <sub>3</sub> OH)               | $6.22 \times 10^5$ | $4.49 \times 10^4$  | $5.92 \times 10^3$ | $1.50 \times 10^4$ | $3.30 \times 10^3$  |
| P-Glu <sub>4</sub> (CH <sub>3</sub> OH)               | $1.83 \times 10^5$ | $1.31 \times 10^4$  | $3.81 \times 10^3$ | $4.87 \times 10^3$ | $3.19 \times 10^3$  |
| P-Glu <sub>4</sub> (H <sub>2</sub> O)                 | $1.30 \times 10^5$ | $1.06 \times 10^4$  | $2.21 \times 10^3$ | $3.98 \times 10^3$ | $2.12 \times 10^3$  |
| P-Gal <sub>4</sub> (CH <sub>3</sub> OH)               | $1.74 \times 10^5$ | $1.18 \times 10^4$  | $1.82 \times 10^3$ | $3.57 \times 10^3$ | $1.26 \times 10^3$  |
| P-Gal <sub>4</sub> (H <sub>2</sub> O)                 | $1.38 \times 10^5$ | $0.866 \times 10^4$ | $1.71 \times 10^3$ | $3.09 \times 10^3$ | $0.973 \times 10^3$ |

| $\lambda_{\max}$                                      | Soret Band | Q <sub>1</sub> | Q <sub>2</sub> | Q <sub>3</sub> | Q <sub>4</sub> |
|-------------------------------------------------------|------------|----------------|----------------|----------------|----------------|
| TPPF <sub>20</sub> (CH <sub>2</sub> Cl <sub>2</sub> ) | 411        | 506            | 535            | 582            | 623            |
| TPPF <sub>20</sub> (CH <sub>3</sub> OH)               | 406        | 503            | 534            | 579            | 632            |
| P-Glu <sub>4</sub> (CH <sub>3</sub> OH)               | 410        | 505            | 535            | 583            | 647            |
| P-Glu <sub>4</sub> (H <sub>2</sub> O)                 | 410        | 508            | 541            | 584            | 646            |
| P-Gal <sub>4</sub> (CH <sub>3</sub> OH)               | 410        | 504            | 536            | 582            | 648            |
| P-Gal <sub>4</sub> (H <sub>2</sub> O)                 | 410        | 508            | 538            | 577            | 641            |

5. MALDI mass spectra of P-Glu<sub>4</sub> and P-Gal<sub>4</sub>.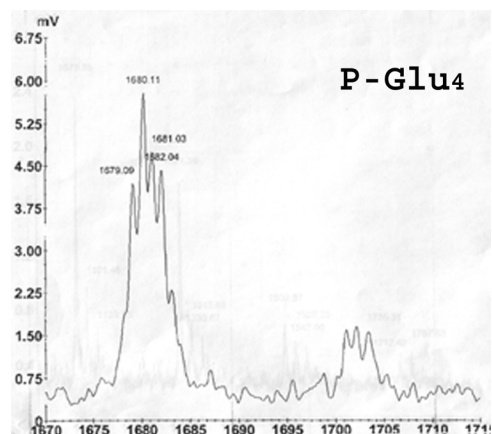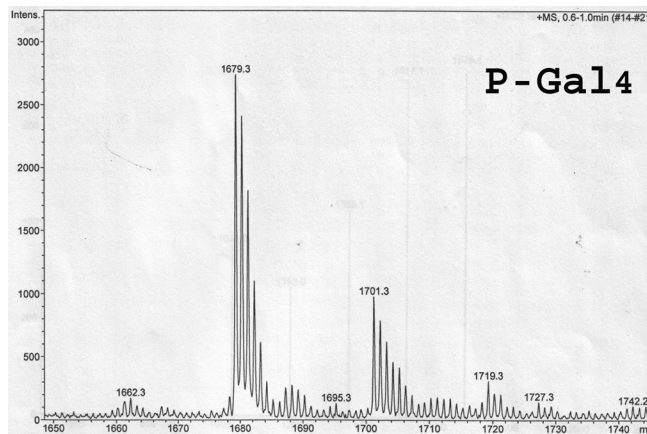

The peaks at 1701 are Na<sup>+</sup> (+23) from the parent peaks, which is typical for sugar porphyrins.

6. Low affinity of P-Glu<sub>4</sub> to mouse NIH3T3 fibroblast (right), compared to human breast cancer MDA-MB-231 cells (left).

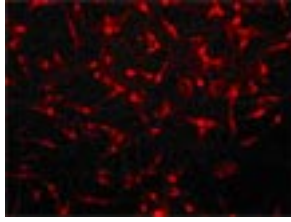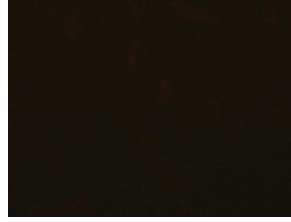

Supplement: NIHMS990405-supplement-1.pdf [file NIHMS990405-supplement-1.pdf]
